# Supplementary material for: Development of an oxidative stress in vitro assay in zebrafish (Danio rerio) cell lines
Source: PubMed Central journal article supplement (PMC6098050; doi:10.1038/s41598-018-30880-1), 2018-08-17
Supplement: 41598_2018_30880_MOESM1_ESM.pdf [file 41598_2018_30880_MOESM1_ESM.pdf]

Development of an oxidative stress *in vitro* assay in zebrafish  
(*Danio rerio*) cell lines

SUPPLEMENTARY INFORMATION

Sebastian Lungu-Mitea\*, Agneta Oskarsson, and Johan Lundqvist

Department of Biomedicine and Veterinary Public Health, Swedish University  
of Agricultural Sciences, Box 7028, SE-750 07 Uppsala, Sweden

\* Corresponding author:

Sebastian Lungu-Mitea

E-mail: [sebastian.lungu@slu.se](mailto:sebastian.lungu@slu.se)

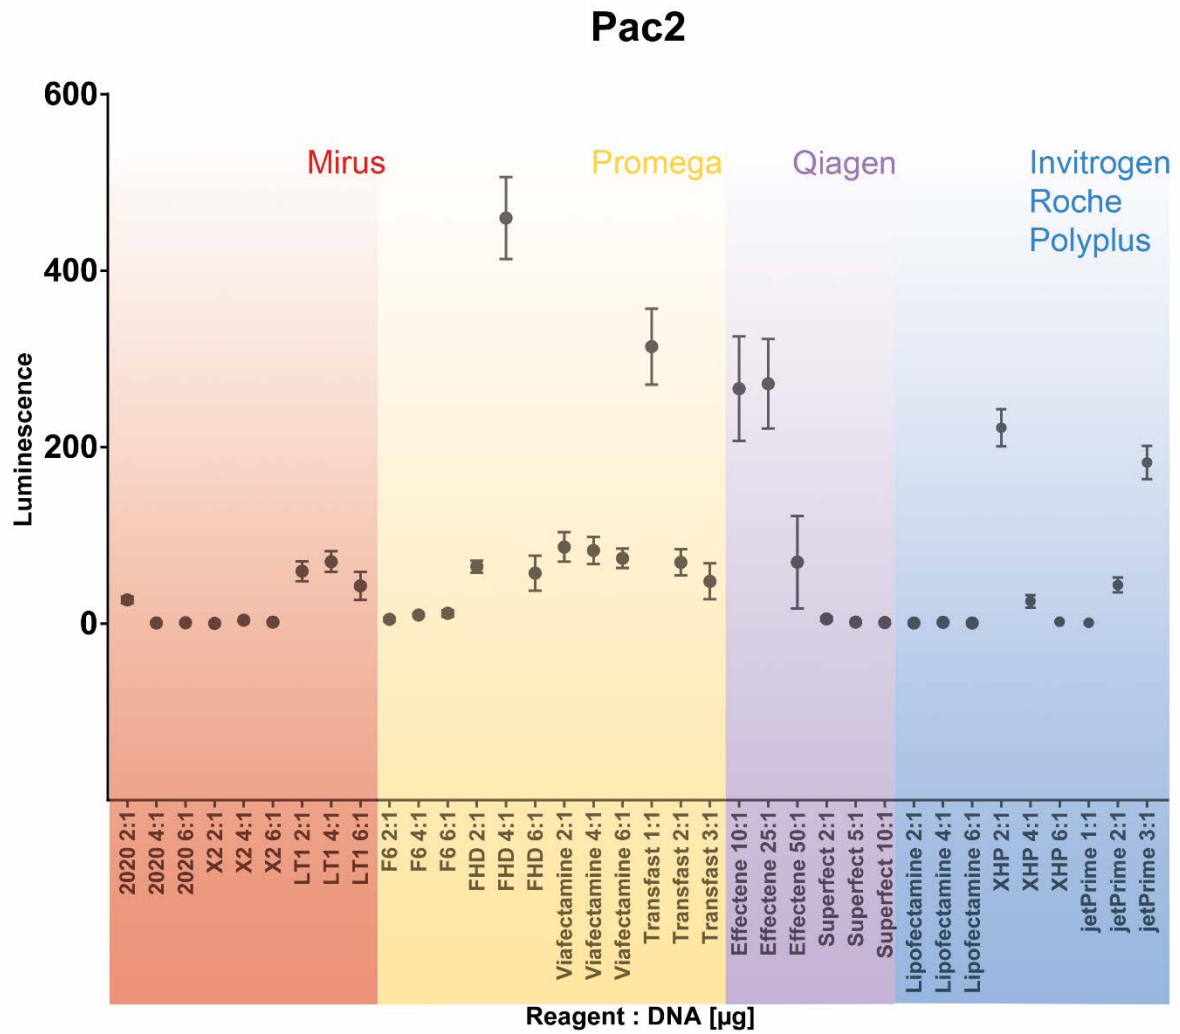

Fig. S1: Transfection efficiency in the zebrafish cell line Pac2. Cells were transfected in quadruplicates in different reagent to DNA mass ratios using 12 transfection reagents (see color-code for specific producer). Efficiency corresponds to measured luminescence in a reporter gene assay using transient Renilla luciferase background induction only, without normalization. Points and whiskers represent mean  $\pm$  SEM (n = 4).

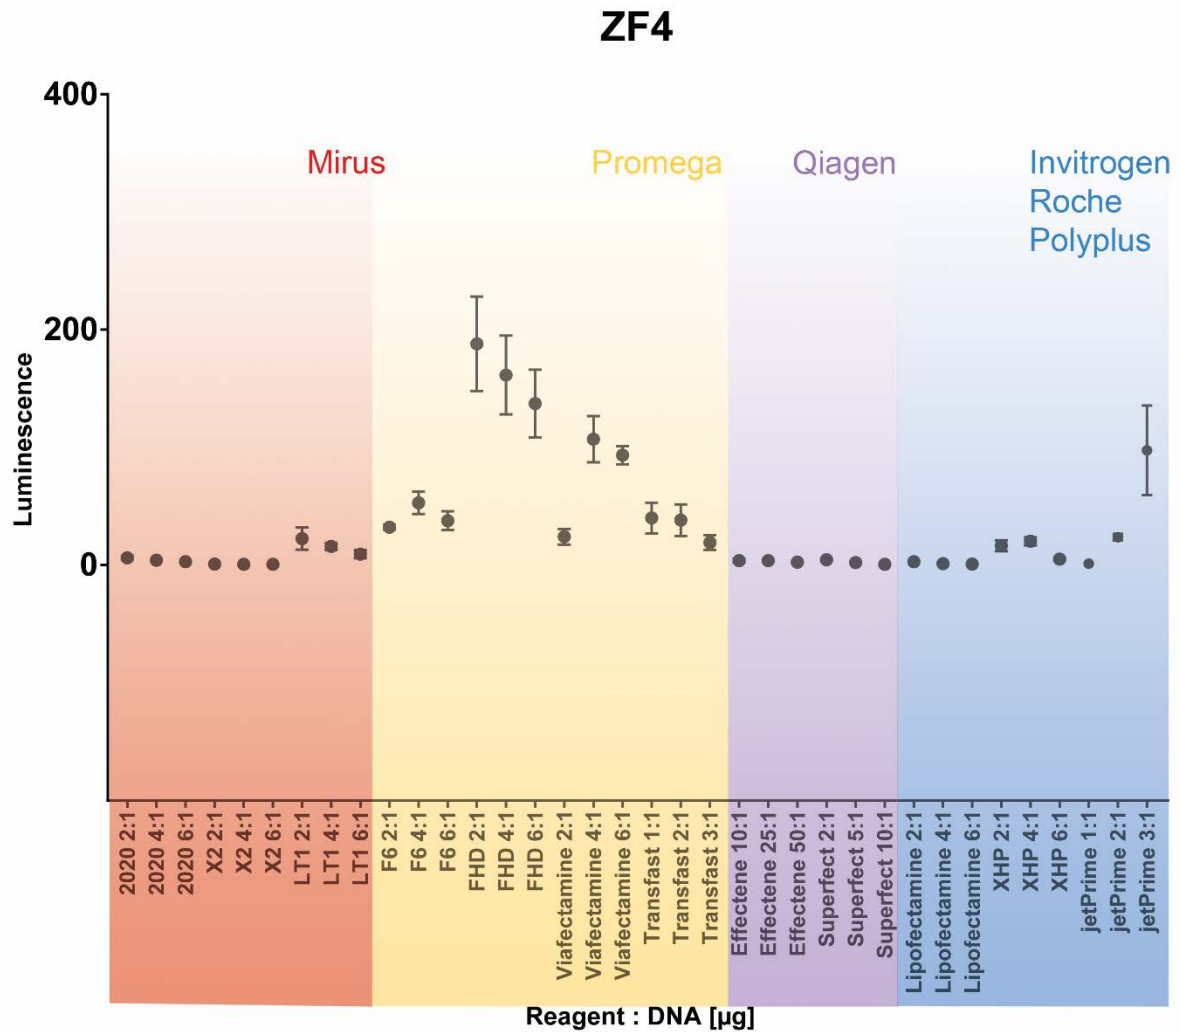

Fig. S2: Transfection efficiency in the zebrafish cell line ZF4. Cells were transfected in quadruplicates in different reagent to DNA mass ratios using 12 transfection reagents (see color-code for specific producer). Efficiency corresponds to measured luminescence in a reporter gene assay using transient Renilla luciferase background induction only, without normalization. Points and whiskers represent mean  $\pm$  SEM (n = 4).

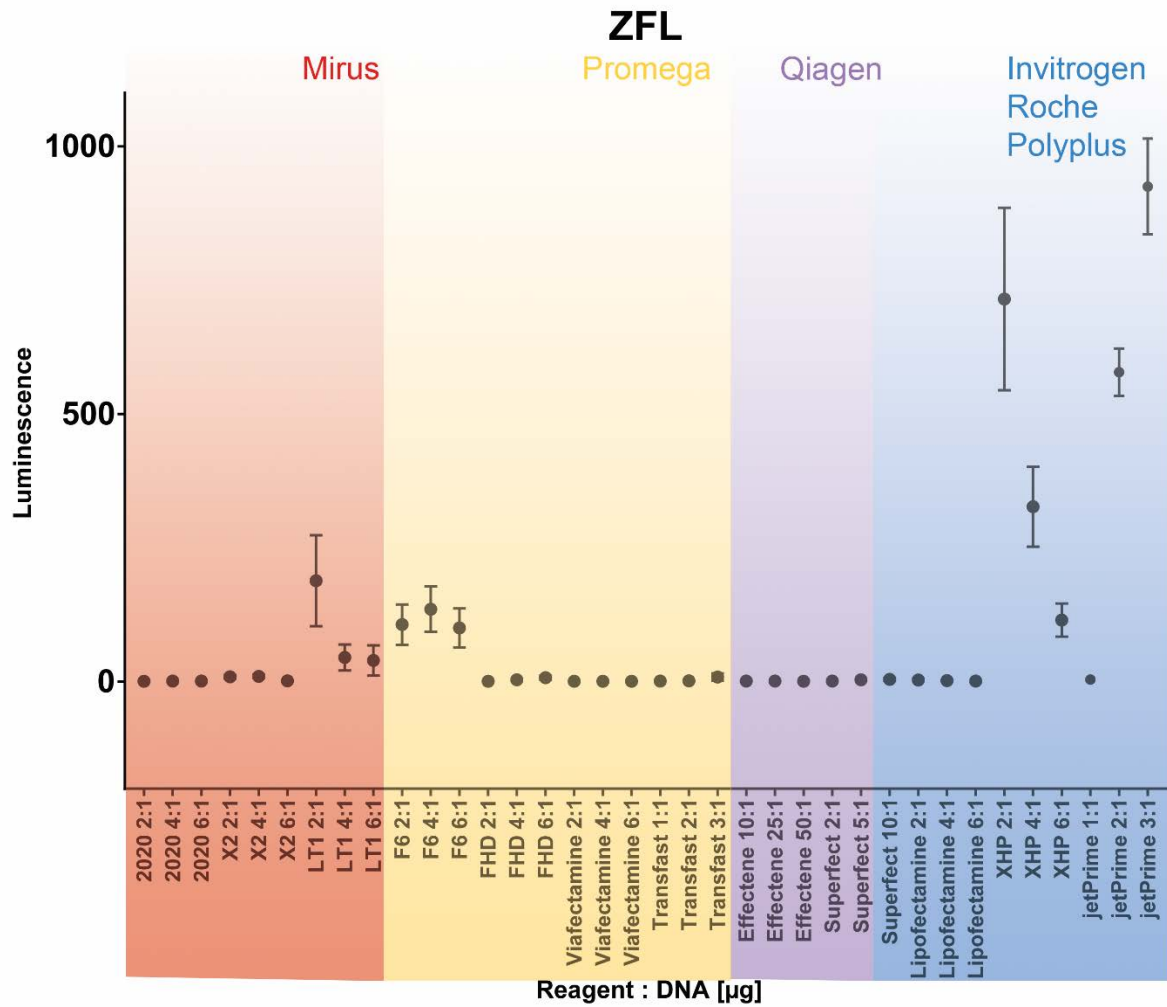

Fig. S3: Transfection efficiency in the zebrafish cell line ZFL. Cells were transfected in quadruplicates in different reagent to DNA mass ratios using 12 transfection reagents (see color-code for specific producer). Efficiency corresponds to measured luminescence in a reporter gene assay using transient Renilla luciferase background induction only, without normalization. Points and whiskers represent mean  $\pm$  SEM (n = 4).
